# Supplementary material for: CReToNeXt-YOLOv5: A study on the construction of pig face expression recognition
Source: Research Square preprint supplement (doi:10.21203/rs.3.rs-3118524/v1), 2023-07-20
Supplement: Supplementary file 1 [file 06289a6b321d29519bcf2052.docx]

|  | Facial changes | | | |  |
| --- | --- | --- | --- | --- | --- |
| Category | Eye | Nose | Lip | Ear | Scene context |
| Happy | Eyes slightly closed | None | Pull up the upper lip | Pull back the ears | Generally in the eating state |
| Neutral | None | None | None | None | Normalcy |
| Fear | Eyes slightly closed | Reduced wrinkles | None | Droopy ears | Generally in a state of shock |
| Anger | Eyes wide open | Deepened wrinkles | Pull up the upper lip | None | Generally before initiating an act of aggression |

**Table 1.** Description of facial expression categories.

| Loss | Overlap | Centre point | Aspect Ratio | Advantages | Disadvantages |
| --- | --- | --- | --- | --- | --- |
| IOU_Loss | √ | × | × | Scale invariance; non-negativity; homogeneity; symmetry; triangular inequality. | If the two boxes do not intersect, it does not reflect the distance between the two boxes;  It does not accurately reflect the size of the overlap between the two boxes. |
| GIOU_Loss | √ | × | × | Solve the problem that loss equals 0 when there is no overlap between the detection box and the real box. | GIOU degenerates to IOU when the detection frame and the real frame appear to be contained;  Slow convergence in the horizontal and vertical directions when the two frames intersect. |
| DIOU_Loss | √ | √ | × | Convergence can be accelerated. | The regression process takes into account the aspect ratio of the Bounding box and there is room for further improvement in accuracy. |
| CIOU_Loss | √ | √ | √ | The loss of detection frame scale, length and width has been increased so that the predicted frames will be more consistent with the real ones. | Aspect ratios describe relative values and are subject to some ambiguity;  No consideration of the balance of difficult and easy samples. |
| EIOU_Loss | √ | √ | √ | The aspect ratio is replaced by a separate calculation of the difference in width and height, whereas Focal Loss is introduced to address the problem of unbalanced hard and easy samples. |  |

**Table 2.** Comparison of loss functions.

| Model | Precision | | | | mAP | Recall | F1-score |
| --- | --- | --- | --- | --- | --- | --- | --- |
| Happy | Neutral | Fear | Anger |
| Yolov5s | 0.974 | 0.691 | 0.806 | 0.835 | 0.827 | 0.779 | 0.77 |
| Yolov5s+EIOU | 0.978 | 0.689 | 0.839 | 0.824 | 0.832 | 0.798 | 0.77 |
| Yolov5s+coordAtt | 0.984 | 0.803 | 0.864 | 0.831 | 0.870 | 0.827 | 0.67 |
| Yolov5s+coordAtt+EIOU | 0.984 | 0.775 | 0.868 | 0.877 | 0.876 | 0.826 | 0.82 |
| Yolov5s+coordAtt+EIOU+CReToNeXt | 0.985 | 0.809 | 0.896 | 0.889 | 0.894 | 0.874 | 0.84 |

**Table 3.** Self-validation results of the CReToNeXt-YOLOv5 model.

| Model | K Nearest Neighbors | Naive Bayesian Model | Decision Tree Model | Random Forest | Support Vector Machine | Hidden Markov Model | CReToNeXt-YOLOv5 |
| --- | --- | --- | --- | --- | --- | --- | --- |
|
| Precision | 0.218 | 0.302 | 0.297 | 0.423 | 0.434 | 0.542 | 0.889 |
|
| mAP | 0.291 | 0.306 | 0.362 | 0.458 | 0.463 | 0.598 | 0.894 |
|
| Recall | 0.220 | 0.349 | 0.314 | 0.426 | 0.434 | 0.556 | 0.874 |

**Table 4.** Comparison results of pig face expression database.
